# Supplementary material for: Predicting cardiovascular outcomes in elderly patients with acute coronary syndrome: a nomogram approach
Source: Research Square preprint supplement (doi:10.21203/rs.3.rs-8058920/v1), 2025-12-17
Supplement: Supplementary file 1 [file 758212e094370c47d2713938.docx]

**Supplemental Table 1**. Demographic, laboratory, and clinical characteristics of train and test set population

| Baseline Characteristics/Outcomes | Train set  (n= 1362) | Test set  (n= 584) | p-value |
| --- | --- | --- | --- |
| Demographic and laboratory Characteristics |  |  |  |
| Age | 73.4±7.12 | 73.14±6.67 | 0.303 |
| Male | 916(67.2) | 409(70) | 0.248 |
| Smoking | 465(34.1) | 197(33.7) | 0.902 |
| Opium | 169(12.4) | 63(10.7) | 0.349 |
| BMI | 27.45±4.59 | 27.35±4.31 | 0.64 |
| Weight | 74.02±12.61 | 73.76±12.52 | 0.679 |
| Total Cholesterol | 150.9±37.12 | 152.47±39.8 | 0.424 |
| TG | 121.99±62.9 | 127.4±79.12 | 0.142 |
| LDL | 96.16±32.52 | 96.52±33.83 | 0.827 |
| HDL | 39.29±9.84 | 39.40±9.60 | 0.82 |
| TG/HDL | 3.38±2.13 | 3.55±2.88 | 0.207 |
| TyG.Index | 9026.5±8001 | 9540.7±8768.1 | 0.224 |
| Creatinine | 1.04±0.39 | 1.06±0.48 | 0.334 |
| FBS | 141.4±65.28 | 145.14±73.17 | 0.295 |
| Hb | 14.44±1.96 | 14.45±1.88 | 0.94 |
| Past medical history and comorbidities |  |  |  |
| Family History of CAD | 156(11.4) | 65(11.1) | 0.897 |
| History of Hyperlipidemia | 678(49.7) | 301(51.5) | 0.507 |
| History of Hypertension | 803(58.9) | 356(60.9) | 0.438 |
| History of Diabetes | 646(47.4) | 276(47.2) | 0.984 |
| History of VHD | 27(1.9) | 14(2.3) | 0.68 |
| History of Chronic Lung Disease | 37(2.7) | 22(3.7) | 0.273 |
| History of CVA | 79(5.8) | 28(4.7) | 0.433 |
| History of Renal Failure | 38(2.7) | 19(3.2) | 0.682 |
| History of CPR | 17(1.2) | 8(1.3) | 0.9 |
| Atrial Fibrillation | 22(1.6) | 12(2) | 0.624 |
| In-hospital and procedural characteristics and outcomes |  |  |  |
| Pain to Door Interval | 516.2±674.9 | 562.9±864.4 | 0.219 |
| Pain to Needle Interval | 594.4±681.3 | 636.2±808.6 | 0.275 |
| Door to Needle Interval | 79.6±66.17 | 72.4±57.39 | **0.015** |
| Pre PCI TIMI Flow <2 | 879(64.53) | 377(68) | 0.658 |
| Post PCI TIMI Flow <2 | 42(3) | 25(4.4) | 0.203 |
| No Reflow during PCI | 33(2.4) | 14(2.3) | 0.9 |
| Length of Lesion | 28.3±13.28 | 28.6±14.97 | 0.702 |
| Length of Stent | 28.7±9.7 | 28.7±9.7 | 0.972 |
| Diameter of Stent | 2.94±0.43 | 2.90±0.41 | 0.051 |
| Previous Revascularization | 288(21) | 132(22.6) | 0.488 |
| Previous MI | 221(16.2) | 104(17.8) | 0.428 |
| Post PCI Shock | 35(2.5) | 10(1.7) | 0.322 |
| LVEF | 40.65±7.93 | 40.28±7.93 | 0.112 |
| MACE | 249(182) | 107(18.3) | 0.9 |
|  |  |  |  |
|  |  |  |  |

Values are reported as n (%) or mean ± SD.

TG, triglyceride; HDL, high-density lipoprotein cholesterol; LDL, low-density lipoprotein cholesterol; Tyg. index, Triglyceride-glucose index; FBS, fasting blood sugar; Hb, hemoglobin; CAD, coronary artery disease; VHD, Valvular heart disease; CVA, cerebrovascular accident; CPR, cardiopulmonary resuscitation; PCI, percutaneous coronary intervention; TIMI, Thrombolysis in Myocardial Infarction score; LVEF, Left ventricular ejection fraction; MACEs,major adverse cardiovascular events.

Bold values represent the p-value of <0.05 (statistical significance)

**Supplemental Table 2.** Univariate and multivariate regression analysis investigating probable predictive factors for MACE following PCI in elderly with STEMI

|  |  |  |  |  | Univariate analysis | | |  | Multivariate analysis | | |
| --- | --- | --- | --- | --- | --- | --- | --- | --- | --- | --- | --- |
| Predictive factor | | | | | **OR** | **95%CI** | **p-value** |  | **OR** | **95%CI** | **p-value** |
| LVEF | | | | | 0.94 | 0.92-0.95 | **<0.001** |  | 0.96 | 0.94-98 | **<0.001** |
| Age | | | | | 1.03 | 1.01-1.05 | **<0.001** |  | 1 | 0.98-1.03 | 0.7 |
| Male | | | | | 0.81 | 0.61-1.19 | 0.2 |  |  |  |  |
| BMI | | | | | 0.99 | 0.96-1.02 | 0.6 |  |  |  |  |
| Weight | | | | | 0.99 | 0.98-1 | 0.086 |  |  |  |  |
| Total Cholesterol | | | | | 1 | 0.99-1 | **0.047** |  | 1 | 0.99-1.01 | 0.9 |
| TG | | | | | 1 | 1--1 | 0.6 |  |  |  |  |
| LDL | | | | | 1 | 0.99-1 | 0.11 |  |  |  |  |
| HDL | | | | | 0.98 | 0.97-1 | **0.036** |  | 0.99 | 0.97-1 | 0.14 |
| TG/HDL | | | | | 1.02 | 0.96-1.09 | 0.5 |  |  |  |  |
| TyG.Index | | | | | 1 | 1--1 | **0.016** |  | 1 | 0.99-1.01 | 0.2 |
| Creatinine | | | | | 2.59 | 1.88-3.6 | **<0.001** |  | 1.41 | 1.23-2.33 | **<0.001** |
| FBS | | | | | 1.01 | 1-1.01 | **<0.001** |  | 1.01 | 1-1.01 | **0.002** |
| Hb | | | | | 0.83 | 0.77-0.89 | **<0.001** |  | 0.88 | 0.81-0.95 | **0.001** |
| Family History of CAD | | | | | 0.97 | 0.62-1.48 | 0.9 |  |  |  |  |
| History of Hyperlipidemia | | | | | 0.86 | 0.65-1.13 | 0.3 |  |  |  |  |
| History of Hypertension | | | | | 1 | 0.76-1.33 | 0.9 |  |  |  |  |
| History of Diabetes | | | | | 1.85 | 1.4-2.45 | **<0.001** |  | 1.23 | 0.85-1.80 | 0.3 |
| Smoking | | | | | 0.94 | 0.7-1.25 | 0.7 |  |  |  |  |
| Opium | | | | | 1.05 | 0.69-1.57 | 0.8 |  |  |  |  |
| History of VHD | | | | | 3.71 | 1.68-8.01 | **<0.001** |  | 2.39 | 1.24-5.87 | **0.038** |
| History of Chronic Lung Disease | | | | | 1.24 | 0.52-2.62 | 0.6 |  |  |  |  |
| History of CVA | | | | | 2.05 | 1.22-3.35 | **0.005** |  | 1.1 | 0.59-1.98 | 0.8 |
| History of Renal Failure | | | | | 5.31 | 2.76-10.31 | **<0.001** |  | 2.02 | 0.74-5.53 | 0.2 |
| History of CPR | | | | | 4.07 | 1.51-10.8 | **0.004** |  | 2.23 | 0.64-7.07 | 0.2 |
| Atrial Fibrillation | | | | | 2.61 | 1.03-6.15 | **0.03** |  | 1.58 | 0.55-4.16 | 0.4 |
| Pain to Door Interval | | | | | 1 | 1--1 | 0.2 |  |  |  |  |
| Pain to Needle Interval | | | | | 1 | 1--1 | 0.2 |  |  |  |  |
| Door to Needle Interval | | | | | 1 | 1--1 | 0.3 |  |  |  |  |
| Pre PCI TIMI Flow <2 | | | | | 0.9 | 0.79-1.01 | 0.072 |  |  |  |  |
| Post PCI TIMI Flow <2 | | | | | 0.64 | 0.52-0.76 | **<0.001** |  | 0.43 | 0.19-1 | **0.042** |
| No Reflow during PCI | | | | | 1.21 | 0.48-2.67 | 0.7 |  |  |  |  |
| Length of Lesion | | | | | 1.01 | 1-1.02 | **0.028** |  | 1.01 | 0.99-1.02 | 0.3 |
| Length of Stent | | | | | 1.01 | 0.99-1.02 | 0.3 |  |  |  |  |
| Diameter of Stent | | | | | 0.62 | 0.44-0.87 | **0.007** |  | 0.69 | 0.49-0.98 | **0.049** |
| Previous Revascularization | | | | | 1.39 | 1-1.89 | **0.048** |  | 1.43 | 0.99-2.04 | 0.053 |
| Previous MI | | | | | 1.26 | 0.87-1.78 | 0.2 |  |  |  |  |
| Post PCI Shock | | | | | 54.6 | 19.3-228 | **<0.001** |  | 28.4 | 9.45-123 | **<0.001** |

Acronyms are explained In Table 1

**Supplemental Table 3.** Comparing the risk of MACE incidence between different risk groups

| Comparison Groups | HR | Lower 95%-CI | Upper 95%-CI | P-value |
| --- | --- | --- | --- | --- |
| >0.75 Vs. <0.75 | 13.12 | 7.09 | 24.25 | <0.001 |
| >0.75 VS. 0.5-0.75 | 1.94 | 1.2 | 3.13 | <0.00L |
| >0.75 V5. 0.25-0.5 | 7.02 | 4.21 | 11.68 | <0.001 |
| >0.75 Vs. <0.25 | 16.74 | 8.73 | 32.1 | <0.001 |
| >0.5 Vs. <0.5 | 11.82 | 8.24 | 16.97 | <0.001 |
| >0.5 V5. 0.25-0.5 | 5.32 | 3.75 | 7.54 | <0.001 |
| >0.5 Vs. <0.25 | 13.87 | 9.5 | 20.25 | <0.001 |
| >0.25 Vs. <0.25 | 4.43 | 3.53 | 5.56 | <0.001 |
| 0.25-0.5 Vs.<0.25 | 2.44 | 1.83 | 3.27 | <0.001 |


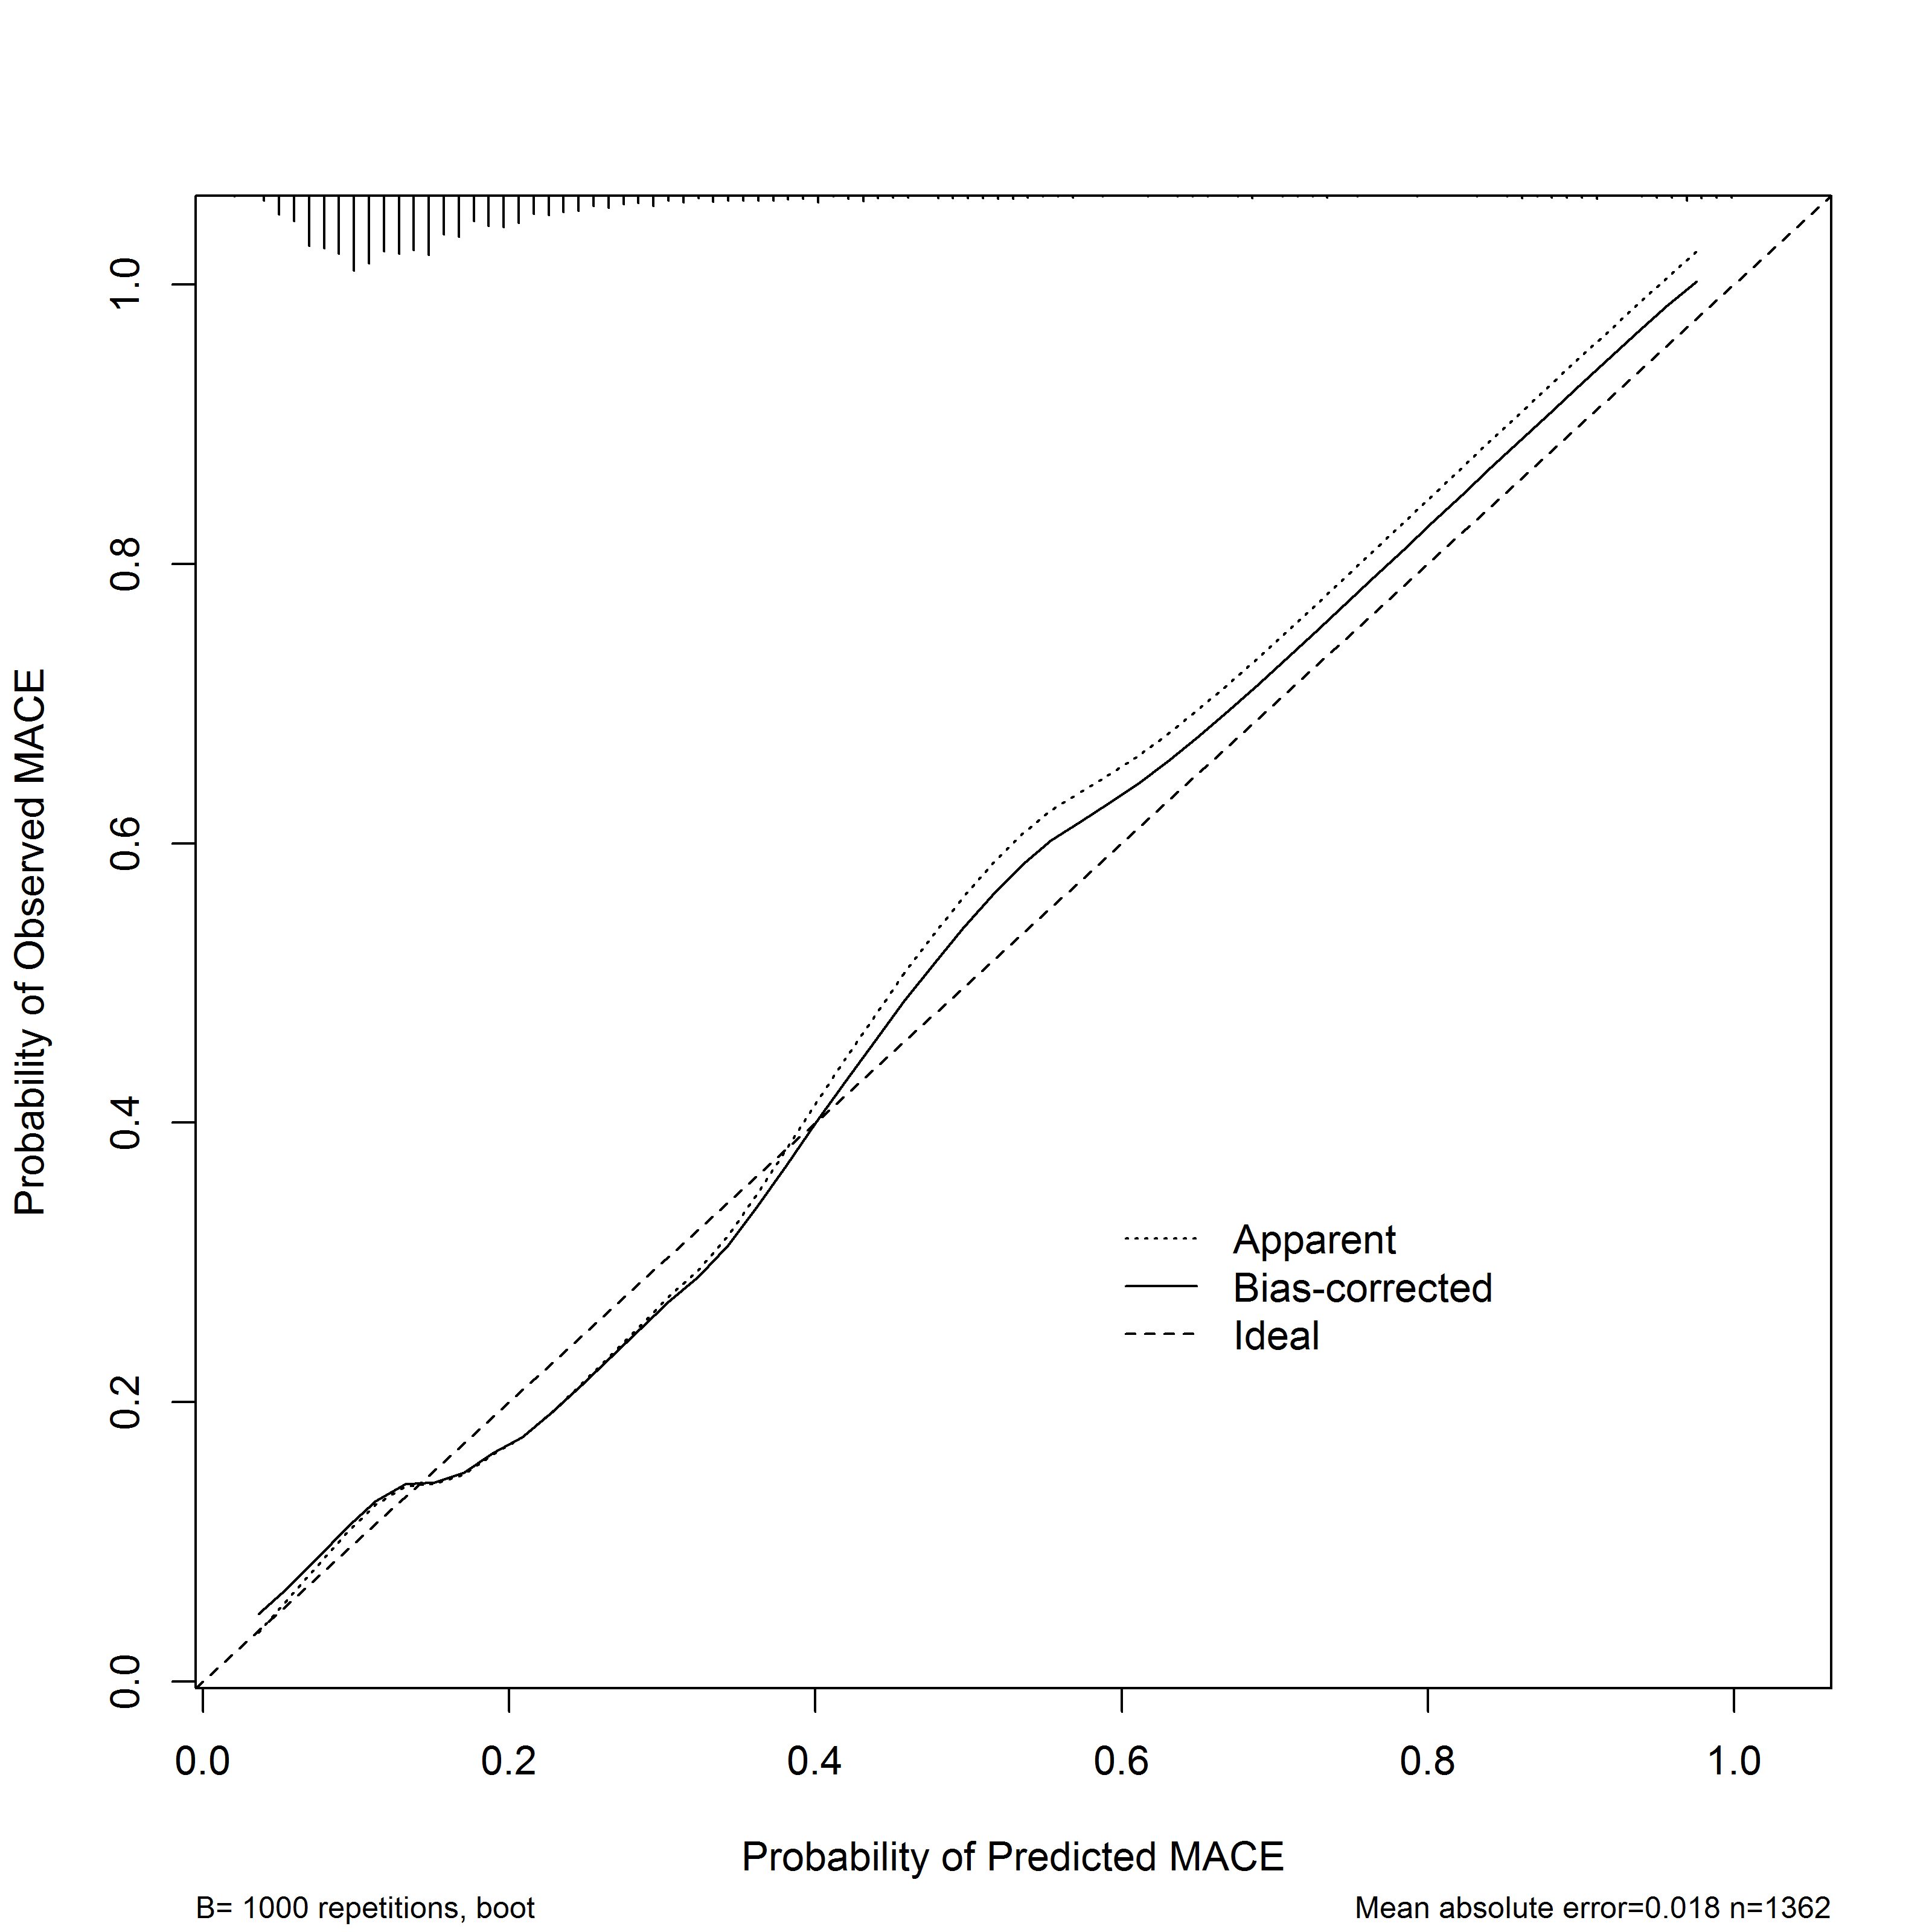


**Supplemental Figure 1** Calibration plot of the model predicting MACE incidence.


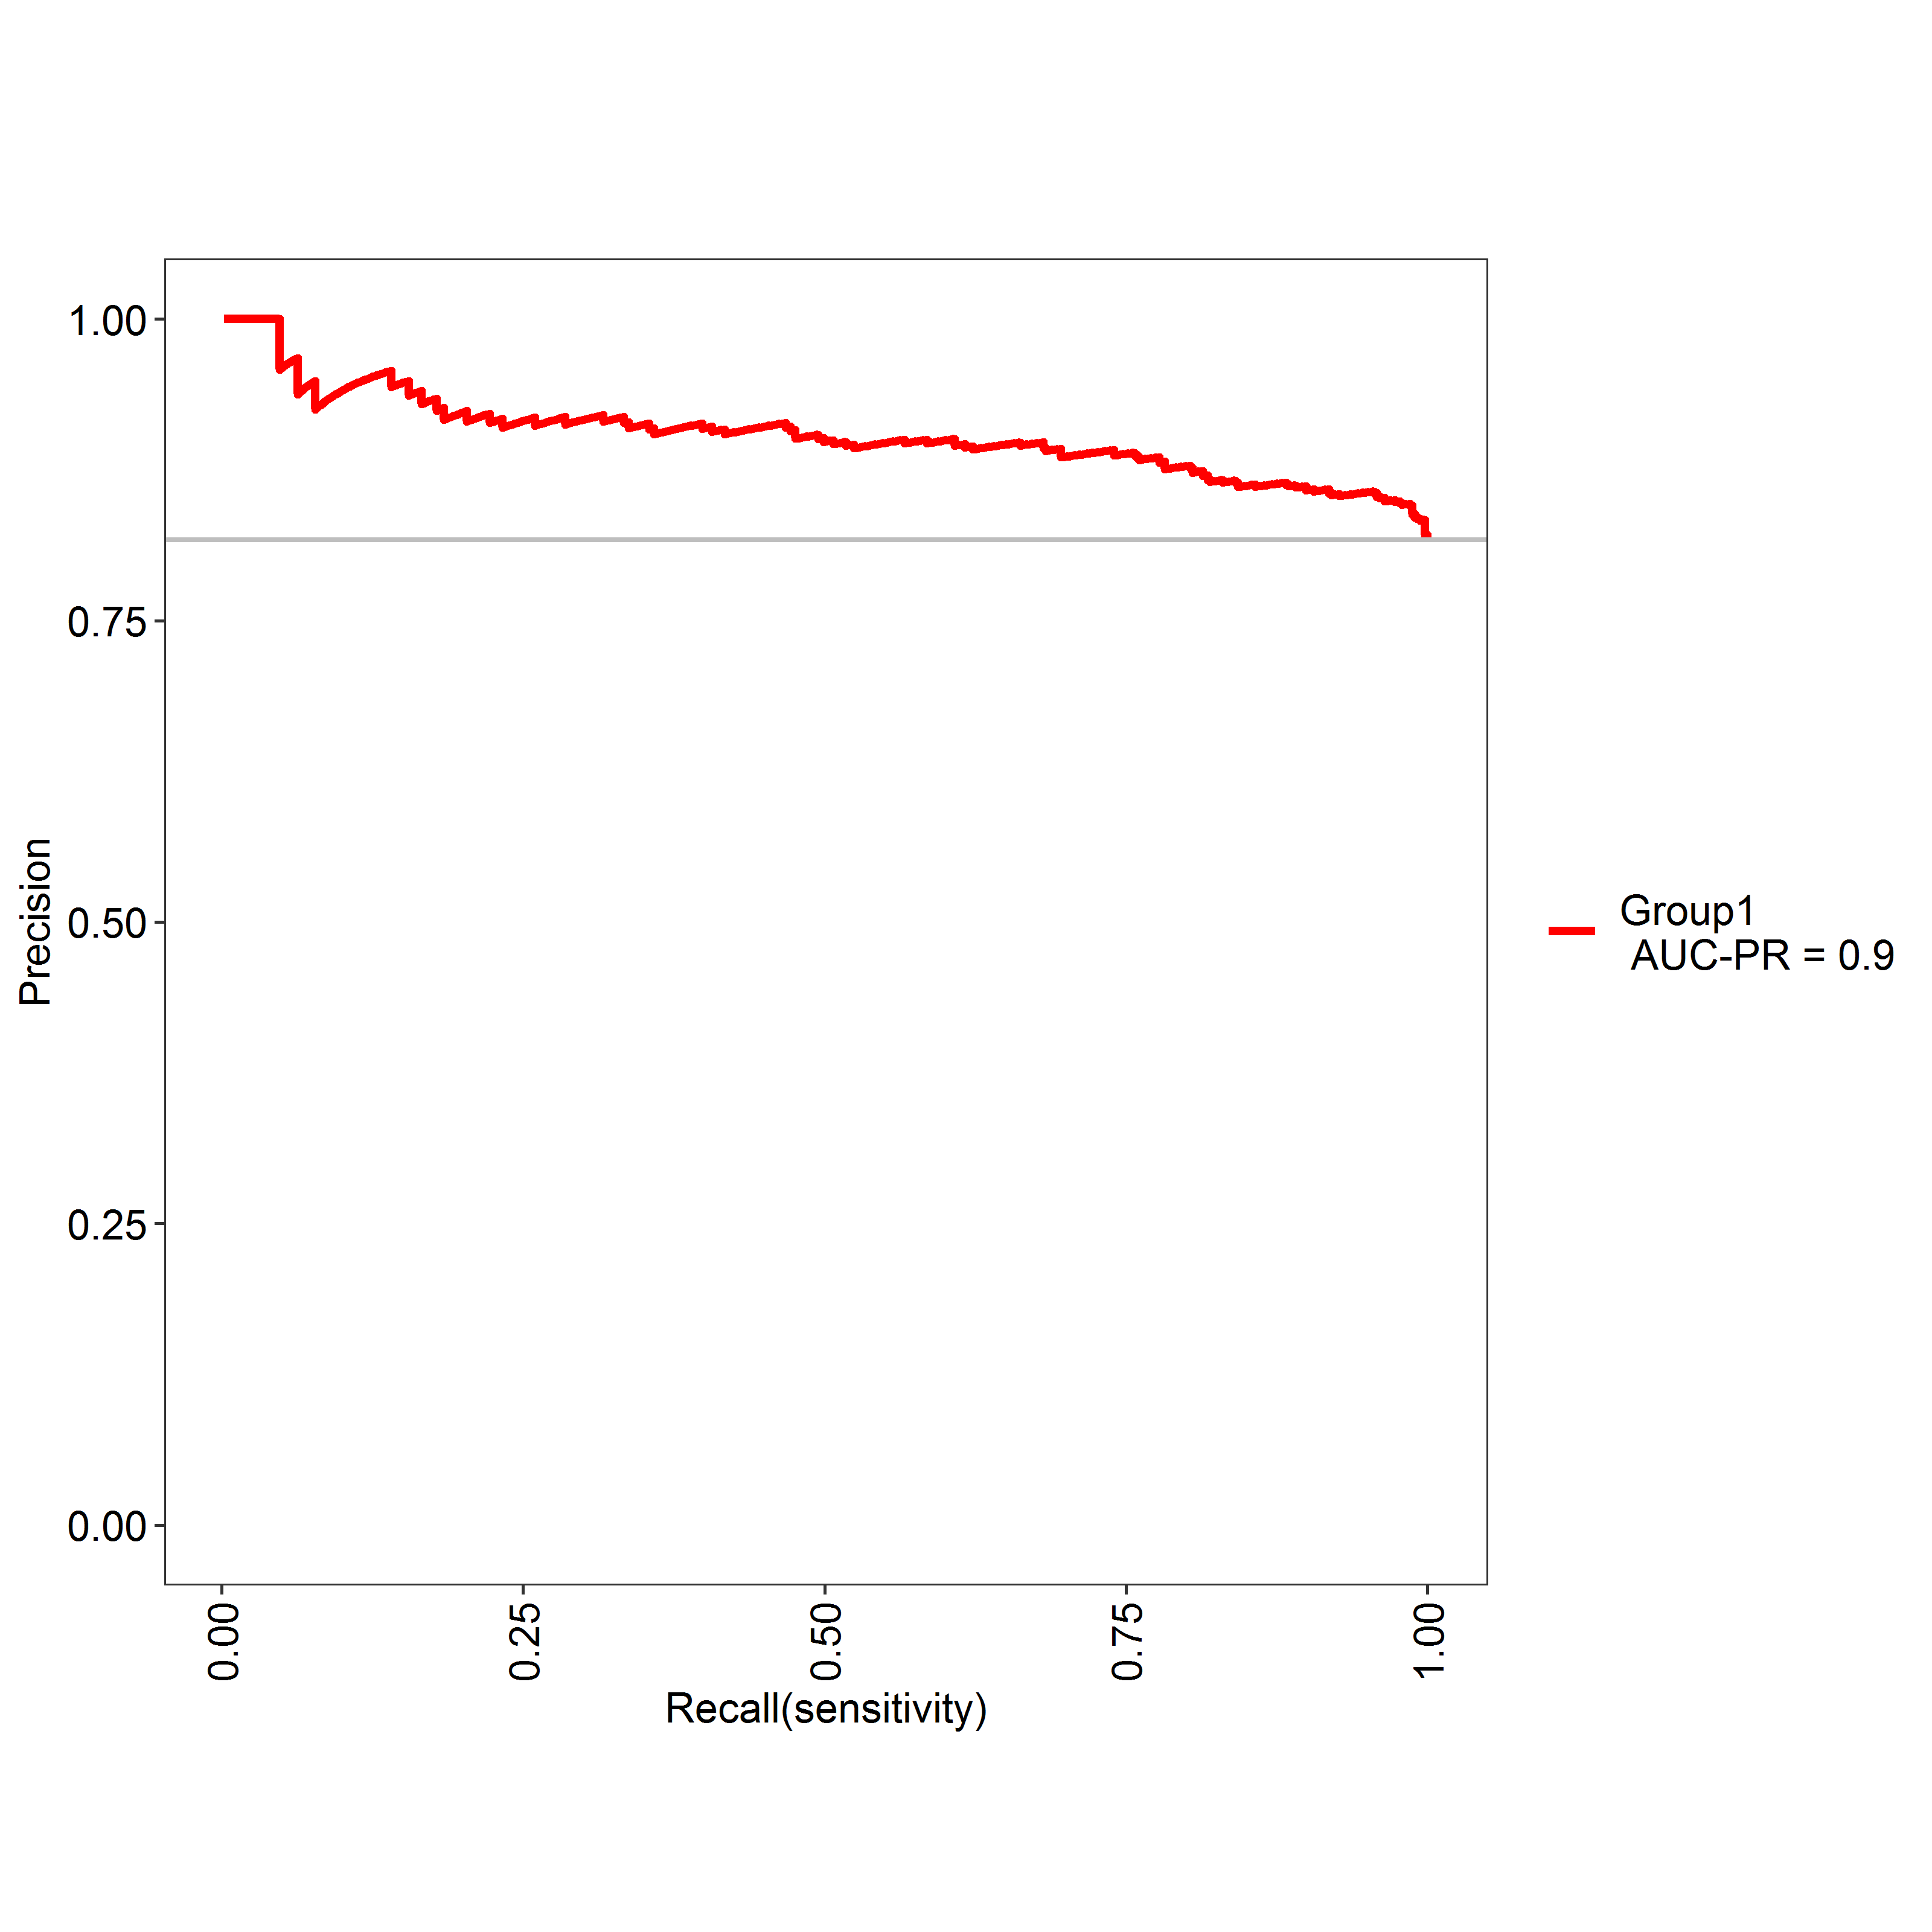


**Supplemental Figure 2** Precision recall curve for MACE incidence prediction.
